## Title

Lack of Accuracy of the GRACE score to Predict Coronary Anatomy in Acute Coronary Syndromes

**Authors:** Mateus dos Santos Viana <sup>1,2</sup> MD, Thomaz Emanuel Azevedo Silva <sup>1</sup>, Gabriela Oliveira Bagano <sup>1</sup> MD, Bruna de Sá Barreto Pontes <sup>1</sup>, Milton Henrique Vitoria de Melo <sup>1</sup>, Pedro Henrique Correia Filgueiras <sup>1</sup> MD, Andre Costa Meireles <sup>1</sup>, Paula Oliveira de Andrade Lopes <sup>1</sup>, Andre Luiz Freitas de Oliveira Junior <sup>1</sup>, João Vitor Miranda de Oliveira Porto <sup>1</sup>, Vitor Calixto de Almeida Correia <sup>1</sup> MD and Luis Claudio Lemos Correia <sup>1,3,4</sup> MD PhD.

## Affiliations

<sup>1</sup> Bahiana School of Medicine and Public Health, Salvador, Brazil.

<sup>2</sup> Federal University of Bahia, Cardiovascular Interventional Unit, University Hospital Professor Edgard Santos, Salvador, Brazil.

<sup>3</sup> Director, Center of Evidence Based Medicine – Bahiana, Salvador, Brazil.

<sup>4</sup> Editor-in-Chief, Journal of Evidence-Based Medicine – Bahiana, Salvador, Brazil.

**Disclosures:** The authors declare no conflict of interest to the contents of this paper

**Funding:** None

**Corresponding author:** Mateus dos Santos Viana

Bahiana School of Medicine and Public Health – Princesa Leopoldina Av., 9/402. Zip code: 40050-420, Salvador, BA – Brasil

**Phone:** +55 71 98870-4763.

**E-mail:** [vianamateus@hotmail.com](mailto:vianamateus@hotmail.com)

**Key words:** acute coronary syndrome, coronary artery disease, coronary angiography, clinical decision rules, cardiology.

**Word count:** 2195

## ABSTRACT

**Introduction:** Coronary anatomy is one of the strongest risk predictors in Acute Coronary Syndromes (ACS), which justifies early coronary angiography. Diagnostic scores for predicting outcomes are usually superior to clinical judgment. Despite being validated for prognosis, the GRACE score has been used to discriminate patients with high or low probability of anatomical severity. **Objective:** To test the hypothesis that the GRACE score actually predicts anatomical severity. **Methods:** The study was carried out by assessing consecutive patients with ACS who underwent invasive angiography. Severe anatomical disease was defined as obstructive involvement ( $\geq 70\%$  in diameter) in (1) left main coronary artery or (2) double or triple vessel disease involving proximal left anterior descending artery or (3) subocclusion. The GRACE score was evaluated under numerical and dichotomous tests. **Results:** A total of 733 patients were evaluated, aged  $63 \pm 14$  years, 61% male and GRACE score of  $119 \pm 37$ . Obstructive coronary disease was observed in 81% of the patients, classified as one, two or three vessel disease, or left main coronary artery involvement in 28%, 23%, 26% and 4%, respectively. The area under the ROC curve of the GRACE score was 0.65 (95% CI = 0.61 - 0.69) for predicting severe disease. The cutoff point below which the first GRACE tertile is defined (109) was used to dichotomize low-risk (N = 318) and medium-high-risk (N = 415) samples. This standard definition of intermediate-high risk by the GRACE score ( $> 109$ ) revealed sensitivity of 67% in detecting severe anatomy (95% CI = 61% - 72%) and specificity of 50% (95% CI = 46% - 55%), resulting in positive likelihood ratio of 1.3 (95% CI = 1.2 - 1.5) and negative likelihood ratio of 0.66 (95% CI = 0.55 - 0.80). There was a weak correlation between GRACE and anatomical scores such as SYNTAX ( $r = 0.36$ ,  $P < 0.001$ ) and Gensini ( $r = 0.36$ ,  $P < 0.001$ ). **Conclusion:** Despite statistical association with extent of anatomical coronary disease, the GRACE Score is not accurate to predict severity of disease before coronary angiography.

## INTRODUCTION

The prognosis of acute coronary syndromes (ACS) varies according to clinical and anatomical characteristics<sup>1</sup>. Probabilistic risk scores are used to assess prognosis based on clinical data, and their results usually guide the selection of patients better suited for invasive strategy, in which coronary anatomy is assessed early. However, clinical risk scores are not well established as predictors of coronary disease's anatomical severity.

Among existing models, the GRACE score is the most accurate for prognosis, being a reliable predictor of death during hospitalization and after 6 months of discharge in patients with ACS<sup>2</sup>. Previous studies indicated positive correlation between the GRACE score and angiographic scores<sup>3,4</sup>, although a comprehensive analysis of its accuracy for severe coronary anatomy had not been carried out before.

The present study aims beyond correlation and evaluates the accuracy of the GRACE score regarding the severity of ACS.

## METHODS

### Research design

This is a cross-sectional diagnostic study, derived from prospective registry of ACS.

### Sample selection

All patients admitted to the coronary care unit with a diagnosis of ACS from July 2007 to December 2017 were included in a Registry of Acute Coronary Syndromes. The criteria for inclusion was defined as typical chest discomfort at rest in the last 48 hours, associated with at least one of the following: positive myocardial necrosis marker, defined by troponin T  $\geq 0.01$   $\mu\text{g/L}$  or troponin I  $> 0.034$   $\mu\text{g/L}$ , which correspond to values above the 99 percentile<sup>5,6</sup>, ischemic electrocardiographic changes, consisting in T wave inversion ( $\geq 0.1$  mV) or transient ST segment depression ( $\geq 0.05$  mV) or coronary artery disease previously documented, defined by a myocardial infarction history or previous angiography showing coronary obstruction  $\geq 50\%$ . For the present analysis, only patients who underwent invasive coronary angiography during hospitalization were selected. Exclusion criteria were previous revascularization surgery or a patient's refusal to participate in study.

The protocol is in accordance with the Declaration of Helsinki<sup>7</sup>, was approved by the Institution's Research Ethics Committee and all evaluated patients signed informed consent forms.

### **Anatomical definitions**

Obstructive coronary artery disease was defined as stenosis  $\geq 70\%$  in any epicardial coronary artery or obstruction  $\geq 50\%$  in left main coronary artery. Severe anatomical disease was defined as obstructive involvement ( $\geq 70\%$  in diameter) in (1) left main coronary artery or (2) double or triple vessel disease involving proximal left anterior descending artery or (3) obstruction  $\geq 95\%$  in any proximal arterial segment.

All patients underwent a coronary anatomy analysis by an experienced interventional cardiologist, blind to treatment modality and clinical condition, who measured the number of vascular territories, categorized severe anatomy and quantified coronary disease extent by using different angiographic scores: modified Gensini, Friesinger, proximal disease score, Duke Jeopardy and SYNTAX.

Gensini score<sup>8</sup> assesses 28 coronary segments, according to CASS map<sup>9,10</sup>, which is scored according to their anatomical relevance (ranging from 0.5 to 5) multiplied by a factor relating to maximum obstruction degree in diameter (0 - 25% = 2; 26% - 50% = 4; 51% - 75% = 8; 76% - 90% = 16; 91% - 99% = 32; 100% = 64 points).

Friesinger score<sup>11</sup> uses a simpler sum of 0 to 15, from three main coronary arteries being quantified from 0 to 5 (0 - without angiographic abnormalities; 1 - diameter irregularities with obstruction  $< 29\%$ ; 2 - localized obstruction with 30 - 68%; 3 - multiple or diffuse obstructions of 30 - 68% in diameter; 4 - luminal obstruction between 69 - 100%, without proximal involvement and 5 - total proximal segment obstruction).

Proximal disease score<sup>8</sup> ranges from 1 to 7 points, with vessels with diameter reduction  $\geq 70\%$  being graded as: 1 - not compromised proximal segment; 2 - 1 proximal right coronary artery segment or circumflex artery affected; 3 - proximal anterior descending artery segment affected; 4 - both proximal involvement of right and circumflex coronary arteries; 5 - proximal anterior descending artery involvement and one of right or circumflex coronary arteries; 6 - Any left coronary trunk segment involvement; 7 - proximal three vessels involvement, with or without left main coronary artery involvement.

Duke Jeopardy<sup>12</sup> angiographic score assesses vessels with  $> 75\%$  obstruction in diameter, using a previously described<sup>13</sup> six-segment coronary grading system to estimate

myocardial mass at risk. Establishing two points for each segment, the total can vary from 0 to 12 points.

Lastly, SYNTAX<sup>14</sup> score, which assesses each coronary with a diameter  $\geq 1.5$  mm and obstruction  $\geq 50\%$  following a previously described tutorial<sup>14</sup>, considering angiographic parameters such as location of lesion and number of affected vessels, presence of bifurcation lesion in coronary ostia, total artery occlusion, time of occlusion, collateral circulation, lesion extent, presence of thrombi, significant tortuosity, excessive calcification and diffuse disease.

### **GRACE Score calculation**

The GRACE score was calculated using clinical data from patients' presentation in the emergency department, such as electrocardiographic records in the first 6 hours of hospital, troponins measurements in the first 12 hours of care and first serum creatinine. Myocardial marker of necrosis was defined as troponin T  $\geq 0.01$   $\mu\text{g/L}$  or troponin I  $\geq 0.034$   $\mu\text{g/L}$ , that is, above the 99 percentile<sup>5,6</sup>.

In summary, the GRACE score consists of eight variables: five of them are semi-quantitative, i.e. different weights for each age group, systolic blood pressure, heart rate, plasma creatinine and Killip class; three of them are dichotomous (ST segment depression, myocardial necrosis marker elevation, cardiac arrest at admission). The final score can vary from 0 to 372<sup>15</sup>, being the cutoff  $< 109$  for low risk and  $\geq 109$  for medium/high risk.

### **Statistical Analysis**

The association of GRACE with anatomical severity was assessed by Spearman's and Pearson's correlation tests, according to normal distribution of the scores. Linear regression was used to demonstrate the influence of GRACE score in coronary disease extent. The Kruskal-Wallis test was used to compare score values between the groups divided according to GRACE tertiles.

The predictive accuracy of risk scores concerning the presence of CAD or severe anatomy was tested with the receiver-operating characteristics (ROC) curve. Sensitivity, specificity, positive and negative likelihood ratios and positive and negative predictive values were also described. The sample size required for correlation analysis was estimated considering a minimum correlation coefficient of 0.25 and an alpha of 0.05. A sample of 96 patients would be enough to provide 80% statistical power in rejecting the null hypothesis of  $r < 0.25$ . All patients consecutively present in the registry who met inclusion criteria were

selected, with no voluntary choice of individuals, making a sample size much larger than estimated.

Statistical analyses were carried out using SPSS (Statistical Package for Social Sciences v. 21.1) and WinPepi (Copyright J.H. Abramson, August 23, 2016; version 11.65).

## **RESULTS**

### **Sample Characteristics**

Out of a total of 1103 patients included in the Registry, 975 patients (88%) underwent invasive coronary angiography. From these, 101 patients who had had previous myocardial revascularization surgery and 141 patients whose diagnostic test had not been properly recorded for analysis were excluded. The study sample therefore consisted of 733 patients aged  $63 \pm 14$  years, 61% male and 33% with history of CAD (Table 1). Non-ST elevation acute myocardial infarction (50%) was the most common ACS presentation, followed by unstable angina (26%) and ST-elevation myocardial infarction (24%). The GRACE score has a median of 115 (IIQ 92 – 140). As outcomes, 3% of individuals had recurrent non-fatal infarction during hospitalization, and 4% had cardiovascular death (Table 2). Obstructive coronary disease was present in 81% of the patients, and 41% presented severe anatomy, with similar 1, 2, or 3 - vessel disease proportion, (28%, 23% and 26%, respectively). The median of SYNTAX score was 10 (IIQ 4 - 21) and for the Gensini score it was 114 (IIQ 72 - 170) (Table 3).

### **Correlation of GRACE score with anatomical severity of disease**

A weak correlation between the GRACE score and the SYNTAX score ( $r = 0.36$ ;  $P < 0.001$ ) or Gensini ( $r = 0.36$ ;  $P < 0.001$ ) was found, with an intercept of - 1.85 and a regression coefficient of 0.12 for SYNTAX and intercept values of 37 and regression coefficient of 0.79 for Gensini (Figure 1). Other anatomical variables show the same strength of association, as shown in Table 4.

Accordingly, the extent of coronary disease increased with tertiles of the GRACE score in a moderate fashion. The SYNTAX score had medians of 7 (IIQ 0 - 14), 12 (IIQ 6 - 21) and 17 (IIQ 7 - 27), in the first, second and third tertiles (Figure 2A) respectively ( $P < 0.001$ ), while the Gensini score had medians of 97 (IIQ 62 - 135), 122 (IIQ 85 - 174) and 122 (IIQ 85 - 174) (Figure 2B), respectively ( $P < 0.001$ ).

### **Accuracy of the GRACE score for anatomical severity of CAD**

The GRACE score has a modest discriminatory capacity in detecting severe anatomy, with an area under the ROC curve (Figure 3) of 0.65 (95% CI 0.60 - 0.69;  $P < 0.001$ ). The prevalence of severe anatomy according to tertiles of this score was respectively 32%, 41% and 59% ( $P < 0.001$ ).

Accuracy of traditional GRACE's cut-off points proved to be weak for predicting severe anatomy. The cut-off point below which the first tertile of GRACE score (109) is defined was used to dichotomize the sample at low risk ( $N = 318$ ) and medium-high risk ( $N = 415$ ). This criteria showed sensitivity of 67% to detect severe anatomy (95% CI = 61% - 72%) and specificity of 50% to identify patients without severe anatomy (95% CI = 46% - 55%), resulting in a positive likelihood ratio of 1.3 (95% CI = 1.2 - 1.5) and a negative likelihood ratio of 0.66 (95% CI = 0.55 - 0.80), which were insufficient to satisfactorily increase or decrease the pretest probability of severe anatomy. Accordingly, the positive predictive value of  $GRACE \geq 109$  was 48% (95% CI = 45% - 52%), and the negative predictive value of  $GRACE < 109$  was 68% (95% CI = 64% - 72%) for severe anatomy.

### **DISCUSSION**

This study indicates that the accuracy of the GRACE score for anatomical severity of CAD is modest. Coronary anatomy was analyzed both quantitatively, expressed in the form of angiographic scores, and qualitatively, defined as severe anatomy. In the former analysis, despite a linear association between angiographic and the GRACE scores, the correlation coefficient was weak. In accordance, there was a small area under the curve of GRACE to predict severe anatomy.

Previous studies<sup>3,4</sup> concluded in favor of GRACE's ability to predict coronary anatomy, but they solely based this conclusion on correlation analysis. This predictive value of the GRACE score was contested in a previous publication of preliminary findings. The present study confirms those preliminary findings<sup>16</sup> with much greater depth, based on a sample seven times larger and more detailed coronary anatomy analyses, in addition to having determined the ROC curve, sensitivity, specificity and likelihood ratios and a categorization in risk groups using the traditional cut-off points of the score<sup>2</sup>.

The GRACE scoring system is based on multivariate models that integrate elements from medical history, admission ECG and biochemical myocardial necrosis evidence. This score is not intended to identify coronary artery disease extent and complexity, but its use as a

predictor to determine the need for invasive stratification by coronary angiography is widespread, possibly based on a false premise that association equals accuracy.

A possible explanation for the modest accuracy of GRACE for anatomic prediction comes from the fact that anatomical disease extent represents only one of many severity determinants in a complex multivariate model, typical of most biological systems<sup>16</sup>. The GRACE model was generated and validated to predict mortality, but this outcome depends, mostly, on an individual's susceptibility to ACS (age, fragility, comorbidities) and not only on ischemia burden. Secondly, the manifestation of myocardial infarction severity, clinically expressed by Killip's classification, serum troponin levels, ECG wall extent and echocardiogram among other clinical data, are more dependent on variables such as time from onset of symptoms to reperfusion, reperfusion success and extent of myocardium affected by the artery related to the event than on atherosclerotic disease burden per se<sup>17-23</sup>.

A further remarkable aspect of this study is a linear association tested with a large number of angiographic scores, all pointing to the same direction. It is widely accepted that a positive correlation is not enough to ensure satisfactory accuracy. This should be evaluated by measures that identify unhealthy and healthy individuals, such as sensitivity and specificity, respectively. Furthermore, accuracy involves the concepts of positive and negative likelihood ratios, which in turn increases or decreases the pretest probability of a certain condition such as severe coronary anatomy. The results confirm a positive association of the GRACE score with coronary disease extent but demonstrate no satisfactory accuracy to predict such outcome.

A limitation of the study, to be covered in further research, was a selection bias for patients who underwent coronary angiography, to the exclusion of patients with lower risk or probable lesser disease extent.

## CONCLUSION

Based on the largest sample and set of data analyzed so far, this study indicated that the GRACE score is not an accurate tool to satisfactorily predict the extent of coronary disease in patients with ACS. The utility of this score in clinical reasoning should be limited to estimate risk in prognostic evaluations.



## REFERENCES

- 1 Antman EM, Cohen M, Bernink PJ, McCabe CH, Horacek T, Papuchis G, et al. The TIMI risk score for unstable angina/non-ST elevation MI: A method for prognostication and therapeutic decision making. *JAMA* 2000 Aug 16;284(7):835-42.
- 2 Roffi M, Patrono C, Collet JP, Mueller C, Valgimigli M, Andreotti F, et al. 2015 ESC Guidelines for the management of acute coronary syndromes in patients presenting without persistent st-segment elevation: Task force for the management of acute coronary syndromes in patients presenting without persistent ST-segment elevation of . *Eur Heart J*. 2016;37(3):267–315.
- 3 Cakar MA, Sahinkus S, Aydin E, Vatan MB, Keser N, Akdemir R, Gunduz H. Relation between the GRACE score and severity of atherosclerosis in acute coronary syndrome. 2014. *Journal of Cardiology*, 63(1), 24–28. <https://doi.org/10.1016/j.jjcc.2013.06.017>.
- 4 Saha T, Khalequzzaman M, Akanda MAK, Saha S, Tushar AZ, Ahmed R, Ullah M. (2015). Association of GRACE Risk Score with Angiographic Severity of Coronary Artery Disease in patients with ST Elevation Myocardial Infarction. *Cardiovascular Journal*, 8(1), 30–34. <https://doi.org/10.3329/cardio.v8i1.24765>.
- 5 Apple FS, Pearce LA, Smith SW, Kaczmarek JM, Murakami MM. Role of monitoring changes in sensitive cardiac troponin I assay results for early diagnosis of myocardial infarction and prediction of risk of adverse events. *Clin Chem*. 2009;55(5):930-7.
- 6 Apple FS, Quist HE, Doyle PJ, Otto AP, Murakami MM. Plasma 99<sup>th</sup> percentile reference limits for cardiac troponin and creatine kinase MB mass for use with European Society of Cardiology/American College of Cardiology consensus recommendations. *Clin Chem*. 2003;49(8):1331-6.
- 7 Review, C., Communication, S., & Principles, G. (2014). World Medical Association Declaration of Helsinki: ethical principles for medical research involving human subjects. *The Journal of the American College of Dentists*, 81(3), 14–18. <https://doi.org/10.1093/acprof:oso/9780199241323.003.0025>.
- 8 Ringqvist I, Fisher LD, Mock M, Davis KB, Wedel H, Chaitman BR, et al. Prognostic value of angiographic indices of coronary artery disease from the Coronary Artery Surgery Study (CASS). *J Clin Invest*. 1983;71(6):1854-66. (20).
- 9 Investigators CP. PATHOPHYSIOLOGY AND NATURAL HISTORY Coronary Artery Surgery Study (CASS): a randomized trial of coronary artery bypass. *Circulation*. 1983;68(5):939-50.
- 10 Investigators CP, Associates T. Coronary artery surgery study (CASS): a randomized trial of coronary artery bypass surgery. Comparability of entry characteristics and survival in randomized patients and nonrandomized meeting randomization criteria. *J Am Coll Cardiol [Internet]*. 1984 Jan;3(1):114-28. Available from: [https://dx.doi.org/10.1016/S0735-1097\(84\)80437-4](https://dx.doi.org/10.1016/S0735-1097(84)80437-4).

- 11 Friesinger GC, Page EE, Ross RS. Prognostic significance of coronary arteriography. *Trans Assoc Am Physicians*. 1970;83:78-92.
- 12 Calliff RM, Phillips HR, Hindman MC, Mark DB, Lee KL, Behar VS, et al. Prognostic value of a coronary artery jeopardy score. *J Am Coll Cardiol* [Internet]. 1985;5(5):1055–63. Available from: [http://dx.doi.org/10.1016/S0735-1097\(85\)80005-X](http://dx.doi.org/10.1016/S0735-1097(85)80005-X).
- 13 Dash H, Johnson RA, Dinsmore RE, Harthorne JW. Cardiomyopathic syndrome due to coronary artery disease. I. Relation to angiographic extent of coronary disease and to remote myocardial infarction. *Br Heart J* 1977;39:733-739.
- 14 Sianos G, Morel MA, Kappetein AP, et al. The SYNTAX score: an angiographic tool grading the complexity of coronary artery disease. *EuroIntervention* 2005;1:219-227.
- 15 Granger CB, Goldberg RJ, Dabbous O, Pieper KS, Eagle KA, Cannon CP, et al.; Global Registry of Acute Coronary Events Investigators. Predictors of hospital mortality in the global registry of acute coronary events. *Arch Intern Med*. 2003;163(19):2345-53.
- 16 Barbosa CE, Viana M, Brito M, Sabino M, Garcia G, Maraun M, et al. Accuracy of the GRACE and TIMI scores in predicting the angiographic severity of acute coronary syndrome. *Arq Bras Cardiol*. 2012; 99: 818–24.
- 17 Simoons ML, Serruys PW, Van den Brand M et al., for the working group on thrombolytic therapy in acute myocardial infarction of the Netherlands Interuniversity Cardiology Institute. Early thrombolysis in acute myocardial infarction: limitation of infarct size and improved survival. *J Am Coll Cardiol* 1986; 7: 717-28.
- 18 The I.S.A.M. Study Group. A prospective trial of intravenous streptokinase in acute myocardial infarction (I.S.A.M.). Mortality, morbidity, and infarct size at 21 days. *N Engl J Med* 1986; 314: 1465-71.
- 19 Schroder R, Dissmann R, Bruggemann T, et al. Extent of early ST-segment elevation resolution: a simple but strong predictor of outcome in patients with acute myocardial infarction. *J Am Coll Cardiol* 1994; 24: 384–391.
- 20 Serruys PW, Simoons ML, Suryapranata H, Vermeer F, Wijns W, van den Brand M, et al. Preservation of global and regional left ventricular function after early thrombolysis in acute myocardial infarction. *J Am Coll Cardiol* 1986;7:729-42.
- 21 Mathey DG, Rodewald G, Rentrop P, Leitz K, Merx W, Messmer BJ, Rutsch W, Bticherl ES: Intracoronary streptokinase thrombolytic recanalization and subsequent surgical bypass of remaining atherosclerotic stenosis in acute myocardial infarction: complementary combined approach effecting reduced infarct size. preventing reinfarction, and improving left ventricular function. *Am Heart J* 102: 1194. 1981.
- 22 Fibrinolytic Therapy Trialists' (FTT) Collaborative Group. (1994). Indications for fibrinolytic therapy in suspected acute myocardial infarction: collaborative overview of early mortality and major

morbidity results from all randomised trials of more than 1000 patients. *The Lancet*, 343(8893), 311–322. [https://doi.org/10.1016/S0140-6736\(94\)91161-4](https://doi.org/10.1016/S0140-6736(94)91161-4).

- 23 Keeley EC, Boura JA, Grines CL. (2003). Primary angioplasty versus intravenous thrombolytic therapy for acute myocardial infarction: A quantitative review of 23 randomised trials. *Lancet*, 361(9351), 13–20. [https://doi.org/10.1016/S0140-6736\(03\)12113-7](https://doi.org/10.1016/S0140-6736(03)12113-7).

## FIGURES AND TABLES

**Figure 1** – Correlation of GRACE score with angiographic severity according to Gensini (Panel A) and SYNTAX (Panel B) scores.

$r = 0.36$  (Spearman's correlation coefficient),  $P < 0.001$

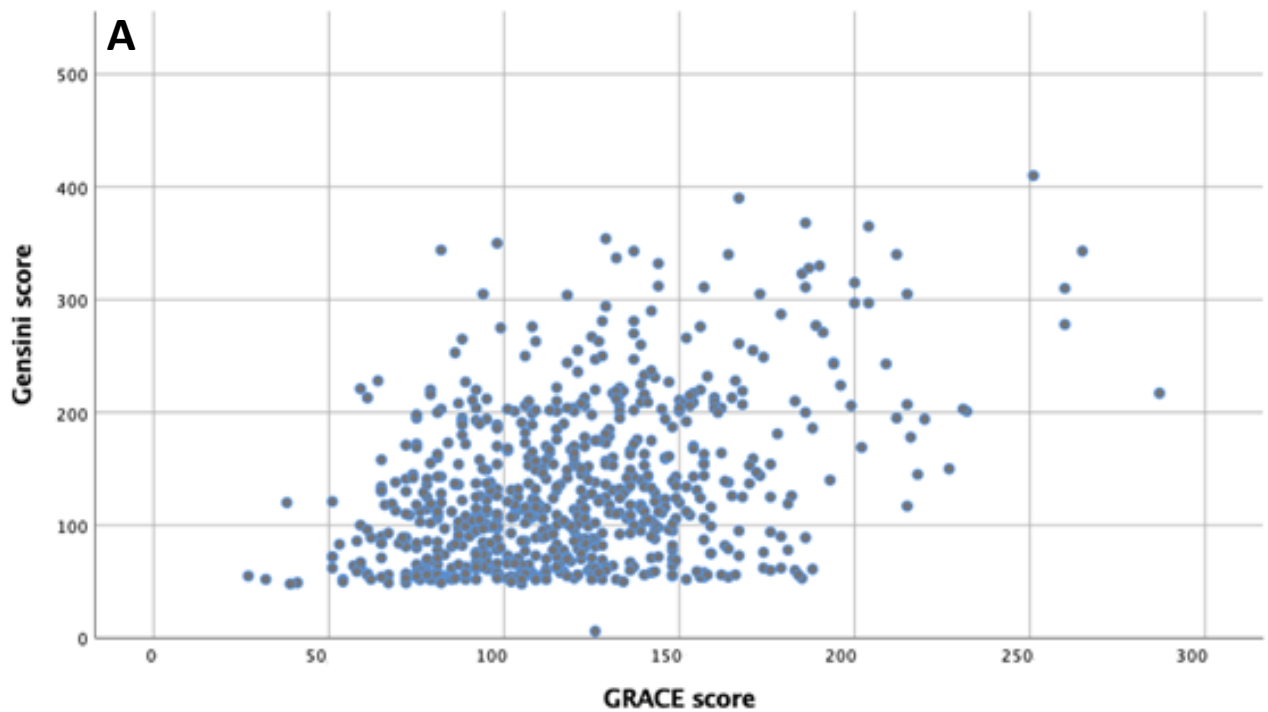

$r = 0.36$  (Spearman's correlation coefficient),  $P < 0.001$

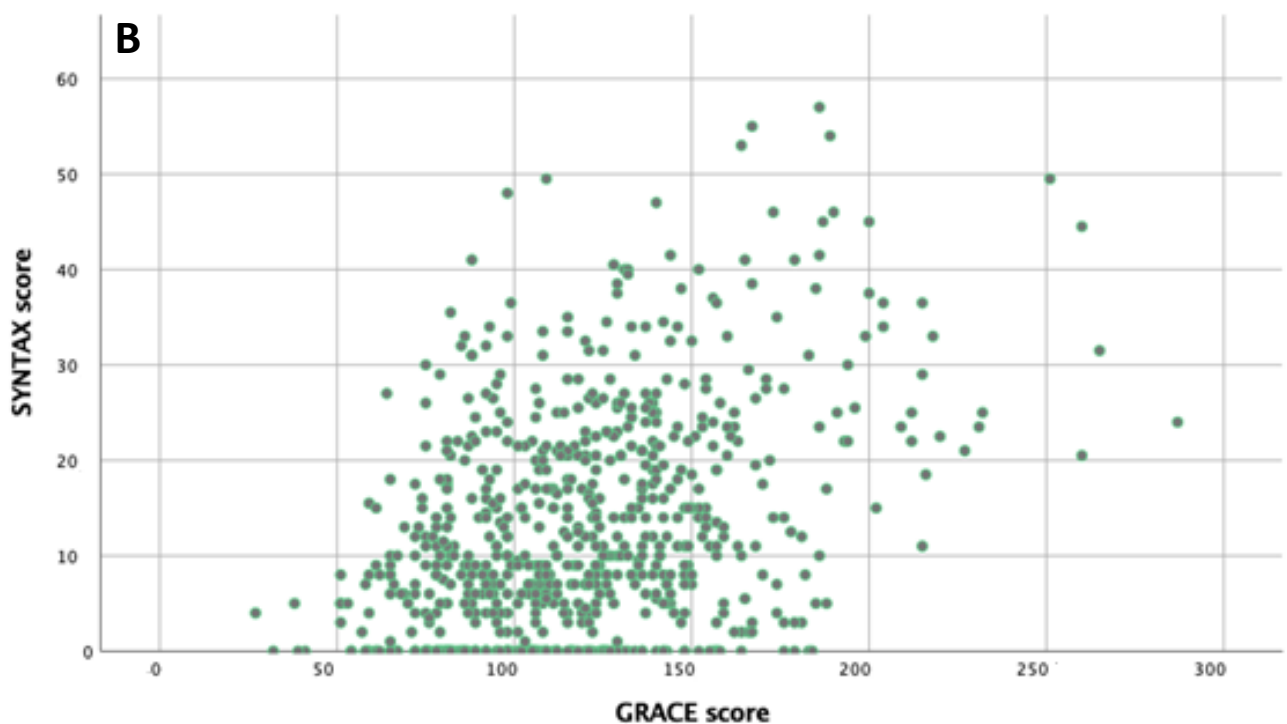

**Figure 2** – Comparison of angiographic severity in ACS between the respective tertiles of GRACE score according to SYNTAX (Panel A) and Gensini (Panel B) scores.

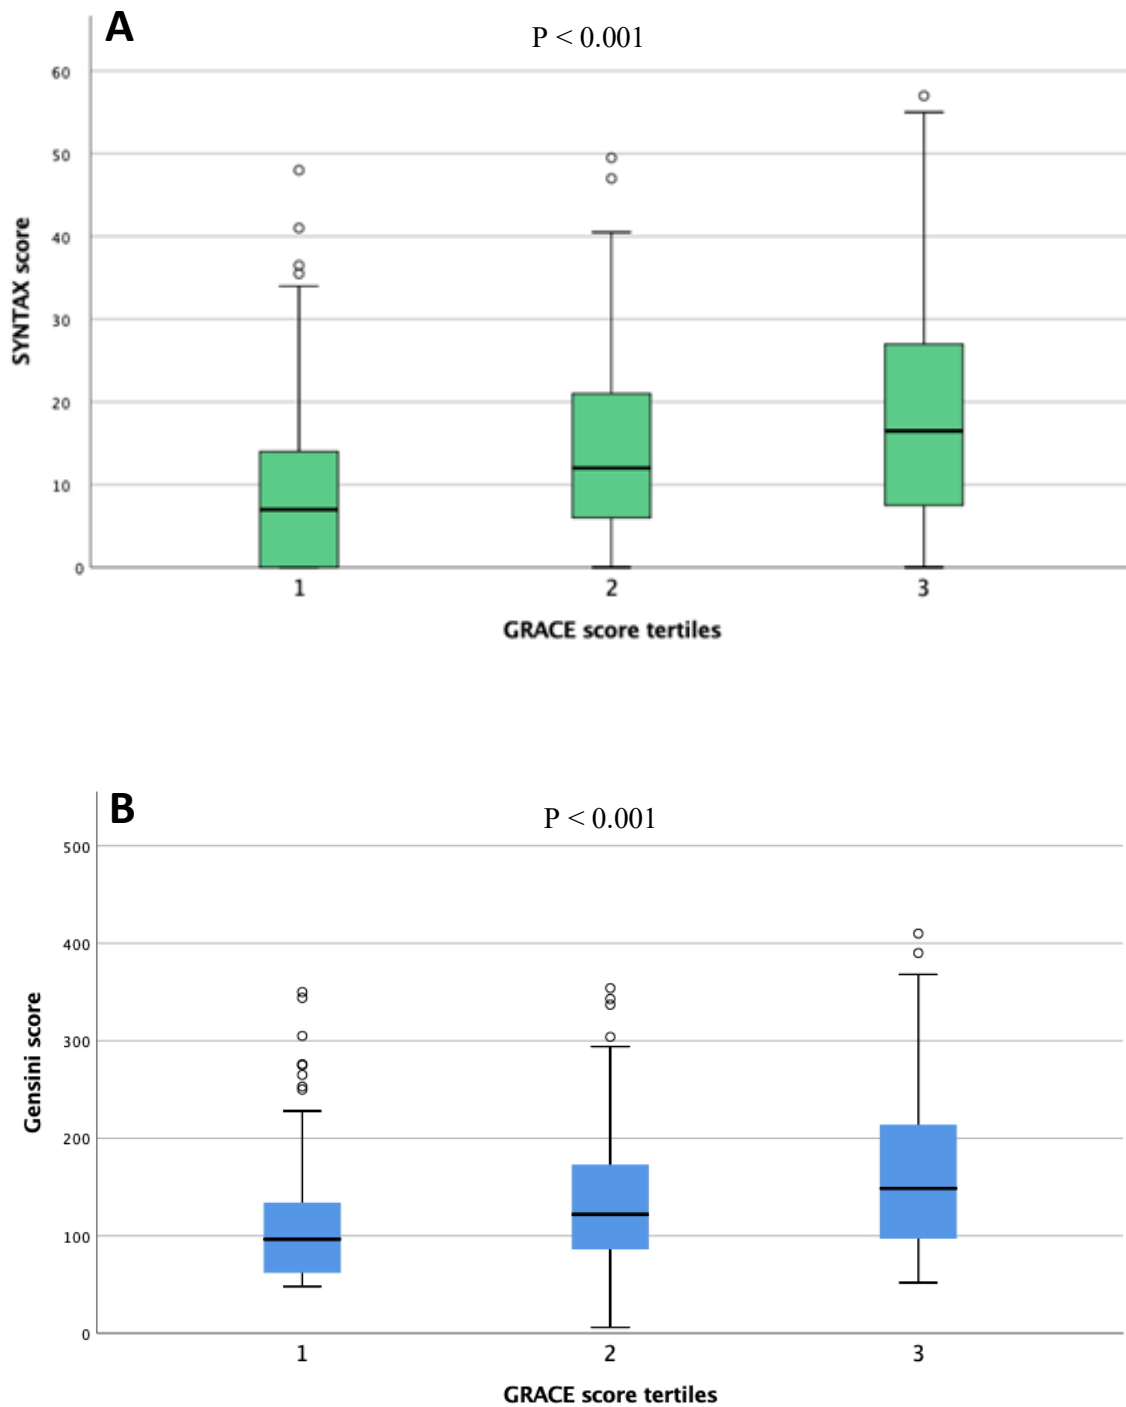

**Figure 3** – Predictive accuracy of GRACE score for severe anatomy in ACS.

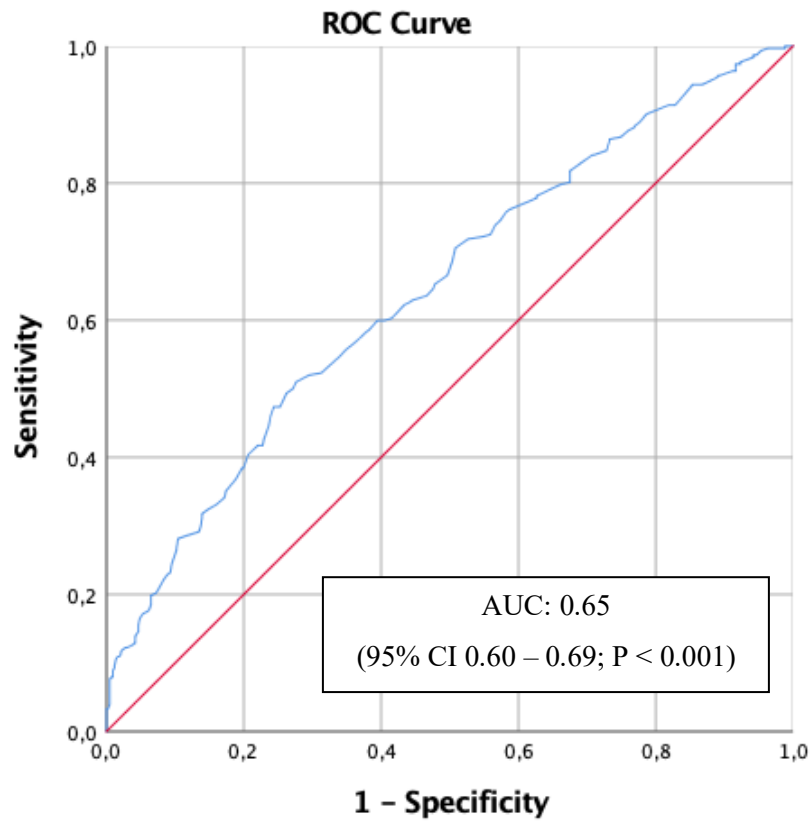

**Table 1** – Clinical characteristics of the sample.

| Characteristic                       | N         |
|--------------------------------------|-----------|
| Sample size                          | 733       |
| Age (years)                          | 63 ± 14   |
| Male                                 | 446 (61%) |
| BMI (kg/m <sup>2</sup> )             | 27 ± 7    |
| Systemic arterial hypertension       | 546 (75%) |
| Diabetes mellitus                    | 252 (34%) |
| Dyslipidemia                         | 444 (61%) |
| Current smoking                      | 82 (11%)  |
| Family history of CAD                | 245 (33%) |
| Previous CAD                         | 242 (33%) |
| Previous CVA                         | 57 (8%)   |
| Previous infarction                  | 151 (21%) |
| Previous peripheral vascular disease | 41 (6%)   |
| ACS presentation                     |           |
| STEMI                                | 180 (24%) |
| NSTEMI                               | 364 (50%) |
| Unstable angina                      | 189 (26%) |
| GRACE score                          | 119 ± 37  |
| Non-fatal infarction                 | 21 (3%)   |
| Cardiovascular death                 | 31 (4%)   |

***BMI** – body mass index, **CAD** – coronary artery disease, **CVA** – cerebrovascular accident, **ACS** – acute coronary syndromes, **STEMI** – ST-elevation myocardial infarction, **NSTEMI** – non-ST elevation myocardial infarction, **GRACE** – global registry of acute coronary events.*

**Table 2** – Laboratorial characteristics and diagnostic tests of the sample.

| Characteristic                        | N                  |
|---------------------------------------|--------------------|
| Sample size                           | 733                |
| Ischemic changes in ECG               | 342 (47%)          |
| Positive troponin                     | 422 (58%)          |
| Killip classification > 1             | 102 (14%)          |
| Serum level of Pro-BNP                | 401 (115 – 1235)   |
| Serum creatinine on admission (mg/dL) | 0.90 (0.80 – 1.10) |
| Clearance of creatinine (ml/min)      | 88 (63 – 116)      |
| Hemoglobin on admission (g/dL)        | 13.8 ± 1.7         |
| Blood glucose on admission (mg/dL)    | 120 (99 – 183)     |
| LDL – cholesterol (mg/dL)             | 105 ± 41           |
| HDL – cholesterol (mg/dL)             | 41 ± 12            |
| Triglycerides (mg/dL)                 | 155 (90 – 178)     |

*ECG* – electrocardiogram at rest, *BNP* – brain natriuretic peptide, *LDL* – low density lipoprotein, *HDL* – high density lipoprotein.

**Table 3** – Coronary anatomy pattern of the sample.

| Anatomic pattern                           | N              |
|--------------------------------------------|----------------|
| Compromised vascular territories           |                |
| No significant obstructions                | 138 (19%)      |
| Uniarterials                               | 203 (28%)      |
| Biarterials                                | 165 (23%)      |
| Triarterial pattern                        | 191 (26%)      |
| Left coronary trunk obstruction            | 29 (4%)        |
| Two or three proximal segments compromised | 102 (14%)      |
| Proximal Arterial Segments score           | 1 (1 – 3)      |
| Duke Jeopardy score                        | 5.2 ± 3.8      |
| Friesinger score                           | 7.6 ± 3.9      |
| Modified Gensini score                     | 114 (72 – 170) |
| SYNTAX score                               | 10 (4 – 21)    |



**Table 4** – Correlation between GRACE score and angiographic data.

| Anatomic score                   | Inclination ( $\beta$ ) | Intercept ( $\alpha$ ) | Correlation ( $r$ ) | P       |
|----------------------------------|-------------------------|------------------------|---------------------|---------|
| Number of arteries               | 0.008                   | 0.73                   | 0.26                | < 0.001 |
| Number of proximal segments      | 0.007                   | - 0.30                 | 0.35                | < 0.001 |
| Proximal Arterial Segments score | 0.015                   | 0.34                   | 0.33*               | < 0.001 |
| Duke Jeopardy score              | 0.034                   | 1.17                   | 0.33                | < 0.001 |
| Friesinger score                 | 0.034                   | 3.56                   | 0.33                | < 0.001 |
| Modified Gensini score           | 0.780                   | 38.04                  | 0.36*               | < 0.001 |
| SYNTAX score                     | 0.12                    | - 1.52                 | 0.36*               | < 0.001 |

\* *Spearman's correlation coefficient was calculated for variables with non-normal distribution. Other coefficients were obtained using Pearson's test.*

**Table 5** – Accuracy of GRACE score to predict severe anatomy.

| Criterion                 | Severe anatomy (CI 95%) |
|---------------------------|-------------------------|
| Sensitivity               | 67% (61% – 72%)         |
| Specificity               | 50% (46% – 55%)         |
| Positive likelihood ratio | 1.3 (1.2 – 1.5)         |
| Negative likelihood ratio | 0.66 (0.55 – 0.80)      |
| Positive predictive value | 48% (45% – 52%)         |
| Negative predictive value | 68% (64% – 72%)         |
